# Supplementary material for: Small-scale screening of anticancer drugs acting specifically on neural stem/progenitor cells derived from human-induced pluripotent stem cells using a time-course cytotoxicity test
Source: PubMed Central journal article supplement (PMC5756610; doi:10.7717/peerj.4187), 2018-01-04

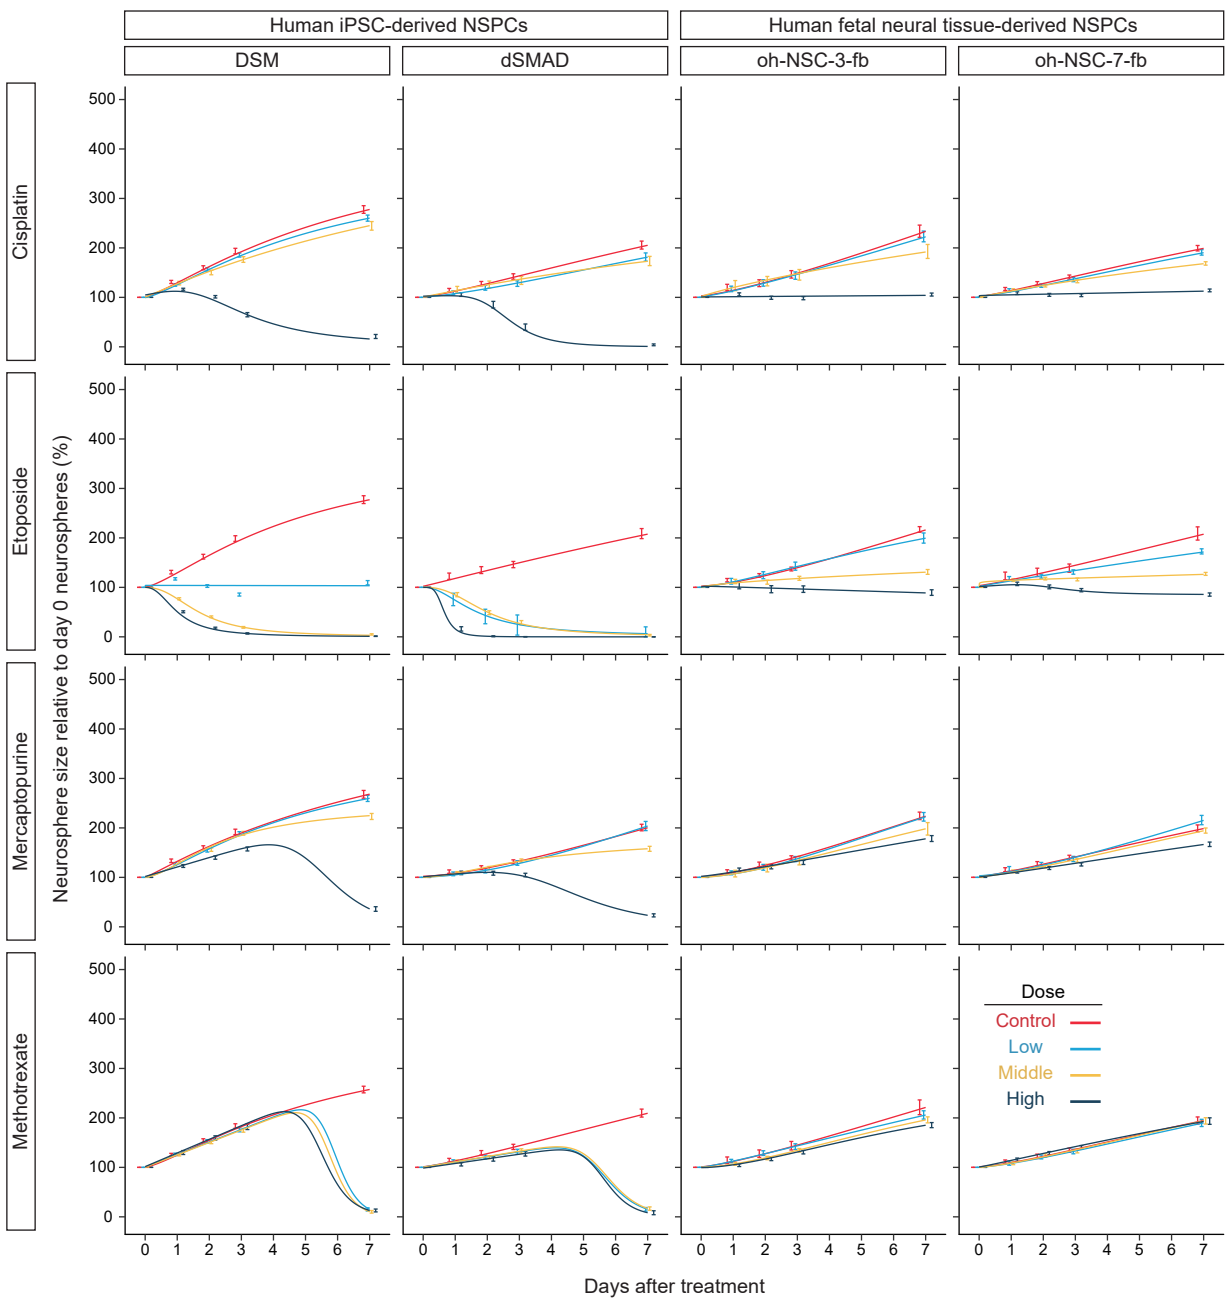

Supplement: peerj-06-4187-s001.pdf [file peerj-06-4187-s001.pdf]
