# Supplementary material for: Small-scale screening of anticancer drugs acting specifically on neural stem/progenitor cells derived from human-induced pluripotent stem cells using a time-course cytotoxicity test
Source: PeerJ. 2018 Jan 4;6:e4187. doi: 10.7717/peerj.4187 (PMC5756610; doi:10.7717/peerj.4187)
Supplement: Table S2 [file peerj-06-4187-s003.xlsx]

## Sheet: Sheet1
Table S2. Raw data on ATP content
Cell Name	Compound	Conc (μM)	ATP (pg/μL)
DSM	Cisplatin	0	9.54632
DSM	Cisplatin	0	9.75741
DSM	Cisplatin	0	8.89503
DSM	Cisplatin	0	9.49552
DSM	Cisplatin	0	9.25088
DSM	Cisplatin	0	8.99314
DSM	Cisplatin	0.1	8.95131
DSM	Cisplatin	0.1	9.07334
DSM	Cisplatin	0.1	8.4767
DSM	Cisplatin	0.1	9.18799
DSM	Cisplatin	0.1	8.41509
DSM	Cisplatin	0.1	8.76974
DSM	Cisplatin	0.3	9.12073
DSM	Cisplatin	0.3	8.86135
DSM	Cisplatin	0.3	9.3184
DSM	Cisplatin	0.3	9.22378
DSM	Cisplatin	0.3	8.91897
DSM	Cisplatin	0.3	9.20533
DSM	Cisplatin	1	9.13674
DSM	Cisplatin	1	8.77881
DSM	Cisplatin	1	8.70334
DSM	Cisplatin	1	8.65011
DSM	Cisplatin	1	8.02355
DSM	Cisplatin	1	8.7244
DSM	Cisplatin	3	9.17965
DSM	Cisplatin	3	8.55825
DSM	Cisplatin	3	9.17113
DSM	Cisplatin	3	9.11076
DSM	Cisplatin	3	8.32773
DSM	Cisplatin	3	9.31895
DSM	Cisplatin	10	8.68566
DSM	Cisplatin	10	9.09578
DSM	Cisplatin	10	8.13743
DSM	Cisplatin	10	8.54287
DSM	Cisplatin	10	8.54112
DSM	Cisplatin	10	9.16934
DSM	Cisplatin	30	8.58338
DSM	Cisplatin	30	9.05258
DSM	Cisplatin	30	8.42095
DSM	Cisplatin	30	8.76717
DSM	Cisplatin	30	9.09442
DSM	Cisplatin	30	8.78698
DSM	Cisplatin	100	7.30814
DSM	Cisplatin	100	6.77659
DSM	Cisplatin	100	6.64752
DSM	Cisplatin	100	7.00352
DSM	Cisplatin	100	7.53148
DSM	Cisplatin	100	7.8325
dSMAD	Cisplatin	0	4.44872
dSMAD	Cisplatin	0	4.27373
dSMAD	Cisplatin	0	4.01017
dSMAD	Cisplatin	0	4.12621
dSMAD	Cisplatin	0	3.98265
dSMAD	Cisplatin	0	3.86738
dSMAD	Cisplatin	0.1	4.32425
dSMAD	Cisplatin	0.1	4.39274
dSMAD	Cisplatin	0.1	4.3744
dSMAD	Cisplatin	0.1	4.31521
dSMAD	Cisplatin	0.1	4.21471
dSMAD	Cisplatin	0.1	4.19067
dSMAD	Cisplatin	0.3	4.0503
dSMAD	Cisplatin	0.3	4.26522
dSMAD	Cisplatin	0.3	4.0611
dSMAD	Cisplatin	0.3	3.95959
dSMAD	Cisplatin	0.3	3.92982
dSMAD	Cisplatin	0.3	4.02554
dSMAD	Cisplatin	1	3.79239
dSMAD	Cisplatin	1	3.88552
dSMAD	Cisplatin	1	3.88299
dSMAD	Cisplatin	1	4.10027
dSMAD	Cisplatin	1	3.73834
dSMAD	Cisplatin	1	4.18006
dSMAD	Cisplatin	3	3.48775
dSMAD	Cisplatin	3	4.21917
dSMAD	Cisplatin	3	4.13174
dSMAD	Cisplatin	3	4.13022
dSMAD	Cisplatin	3	3.76502
dSMAD	Cisplatin	3	3.81669
dSMAD	Cisplatin	10	3.82558
dSMAD	Cisplatin	10	4.14771
dSMAD	Cisplatin	10	3.97118
dSMAD	Cisplatin	10	3.96181
dSMAD	Cisplatin	10	3.99298
dSMAD	Cisplatin	10	3.87392
dSMAD	Cisplatin	30	3.20934
dSMAD	Cisplatin	30	3.65204
dSMAD	Cisplatin	30	3.48256
dSMAD	Cisplatin	30	3.48049
dSMAD	Cisplatin	30	3.33352
dSMAD	Cisplatin	30	3.23471
dSMAD	Cisplatin	100	1.08049
dSMAD	Cisplatin	100	1.11924
dSMAD	Cisplatin	100	1.09072
dSMAD	Cisplatin	100	1.16158
dSMAD	Cisplatin	100	1.09564
dSMAD	Cisplatin	100	0.990188
oh-NSC-3-fb	Cisplatin	0	6.61534
oh-NSC-3-fb	Cisplatin	0	6.67352
oh-NSC-3-fb	Cisplatin	0	6.36016
oh-NSC-3-fb	Cisplatin	0	6.69316
oh-NSC-3-fb	Cisplatin	0	5.3339
oh-NSC-3-fb	Cisplatin	0	7.06775
oh-NSC-3-fb	Cisplatin	0.1	6.72855
oh-NSC-3-fb	Cisplatin	0.1	6.78714
oh-NSC-3-fb	Cisplatin	0.1	5.799
oh-NSC-3-fb	Cisplatin	0.1	5.90599
oh-NSC-3-fb	Cisplatin	0.1	5.61915
oh-NSC-3-fb	Cisplatin	0.1	5.89328
oh-NSC-3-fb	Cisplatin	0.3	7.16432
oh-NSC-3-fb	Cisplatin	0.3	5.12186
oh-NSC-3-fb	Cisplatin	0.3	7.31889
oh-NSC-3-fb	Cisplatin	0.3	7.05068
oh-NSC-3-fb	Cisplatin	0.3	5.19254
oh-NSC-3-fb	Cisplatin	0.3	6.50343
oh-NSC-3-fb	Cisplatin	1	7.32832
oh-NSC-3-fb	Cisplatin	1	6.82749
oh-NSC-3-fb	Cisplatin	1	7.11089
oh-NSC-3-fb	Cisplatin	1	7.40695
oh-NSC-3-fb	Cisplatin	1	7.36942
oh-NSC-3-fb	Cisplatin	1	5.80543
oh-NSC-3-fb	Cisplatin	3	5.92834
oh-NSC-3-fb	Cisplatin	3	5.75651
oh-NSC-3-fb	Cisplatin	3	6.15516
oh-NSC-3-fb	Cisplatin	3	6.06248
oh-NSC-3-fb	Cisplatin	3	6.08936
oh-NSC-3-fb	Cisplatin	3	6.07103
oh-NSC-3-fb	Cisplatin	10	2.97273
oh-NSC-3-fb	Cisplatin	10	3.40856
oh-NSC-3-fb	Cisplatin	10	3.40884
oh-NSC-3-fb	Cisplatin	10	3.75992
oh-NSC-3-fb	Cisplatin	10	3.31333
oh-NSC-3-fb	Cisplatin	10	3.78923
oh-NSC-3-fb	Cisplatin	30	2.51113
oh-NSC-3-fb	Cisplatin	30	2.39725
oh-NSC-3-fb	Cisplatin	30	2.47952
oh-NSC-3-fb	Cisplatin	30	2.49988
oh-NSC-3-fb	Cisplatin	30	2.4212
oh-NSC-3-fb	Cisplatin	30	2.39552
oh-NSC-3-fb	Cisplatin	100	-0.085117
oh-NSC-3-fb	Cisplatin	100	-0.0812623
oh-NSC-3-fb	Cisplatin	100	-0.0739785
oh-NSC-3-fb	Cisplatin	100	-0.0379042
oh-NSC-3-fb	Cisplatin	100	-0.0394617
oh-NSC-3-fb	Cisplatin	100	0.035048
oh-NSC-7-fb	Cisplatin	0	7.18171
oh-NSC-7-fb	Cisplatin	0	7.13994
oh-NSC-7-fb	Cisplatin	0	7.29337
oh-NSC-7-fb	Cisplatin	0	7.0861
oh-NSC-7-fb	Cisplatin	0	7.25423
oh-NSC-7-fb	Cisplatin	0	7.23674
oh-NSC-7-fb	Cisplatin	0.1	7.33737
oh-NSC-7-fb	Cisplatin	0.1	6.88973
oh-NSC-7-fb	Cisplatin	0.1	7.23633
oh-NSC-7-fb	Cisplatin	0.1	7.2676
oh-NSC-7-fb	Cisplatin	0.1	7.14802
oh-NSC-7-fb	Cisplatin	0.1	6.87458
oh-NSC-7-fb	Cisplatin	0.3	7.46437
oh-NSC-7-fb	Cisplatin	0.3	7.13393
oh-NSC-7-fb	Cisplatin	0.3	7.48803
oh-NSC-7-fb	Cisplatin	0.3	7.30223
oh-NSC-7-fb	Cisplatin	0.3	7.49642
oh-NSC-7-fb	Cisplatin	0.3	7.33234
oh-NSC-7-fb	Cisplatin	1	7.25593
oh-NSC-7-fb	Cisplatin	1	6.85946
oh-NSC-7-fb	Cisplatin	1	6.9974
oh-NSC-7-fb	Cisplatin	1	7.03892
oh-NSC-7-fb	Cisplatin	1	7.18224
oh-NSC-7-fb	Cisplatin	1	7.32005
oh-NSC-7-fb	Cisplatin	3	6.75173
oh-NSC-7-fb	Cisplatin	3	6.2161
oh-NSC-7-fb	Cisplatin	3	6.4837
oh-NSC-7-fb	Cisplatin	3	6.66037
oh-NSC-7-fb	Cisplatin	3	6.76994
oh-NSC-7-fb	Cisplatin	3	6.75765
oh-NSC-7-fb	Cisplatin	10	4.64715
oh-NSC-7-fb	Cisplatin	10	4.66249
oh-NSC-7-fb	Cisplatin	10	4.6178
oh-NSC-7-fb	Cisplatin	10	4.42196
oh-NSC-7-fb	Cisplatin	10	4.13026
oh-NSC-7-fb	Cisplatin	10	4.39452
oh-NSC-7-fb	Cisplatin	30	2.12727
oh-NSC-7-fb	Cisplatin	30	1.97554
oh-NSC-7-fb	Cisplatin	30	1.97383
oh-NSC-7-fb	Cisplatin	30	2.01457
oh-NSC-7-fb	Cisplatin	30	2.0921
oh-NSC-7-fb	Cisplatin	30	1.9874
oh-NSC-7-fb	Cisplatin	100	-0.000450546
oh-NSC-7-fb	Cisplatin	100	-0.0778888
oh-NSC-7-fb	Cisplatin	100	-0.0198908
oh-NSC-7-fb	Cisplatin	100	-0.00516459
oh-NSC-7-fb	Cisplatin	100	0.042076
oh-NSC-7-fb	Cisplatin	100	-0.0624896
DSM	Etoposide	0	9.27385
DSM	Etoposide	0	8.93084
DSM	Etoposide	0	8.93709
DSM	Etoposide	0	9.83333
DSM	Etoposide	0	9.46194
DSM	Etoposide	0	9.23463
DSM	Etoposide	0.1	7.51381
DSM	Etoposide	0.1	7.49413
DSM	Etoposide	0.1	6.98715
DSM	Etoposide	0.1	7.59172
DSM	Etoposide	0.1	7.63679
DSM	Etoposide	0.1	7.65363
DSM	Etoposide	0.3	4.63679
DSM	Etoposide	0.3	4.48966
DSM	Etoposide	0.3	4.5418
DSM	Etoposide	0.3	4.7168
DSM	Etoposide	0.3	4.48859
DSM	Etoposide	0.3	4.6715
DSM	Etoposide	1	2.75707
DSM	Etoposide	1	2.57579
DSM	Etoposide	1	2.68872
DSM	Etoposide	1	2.76789
DSM	Etoposide	1	2.6066
DSM	Etoposide	1	2.82517
DSM	Etoposide	3	1.35707
DSM	Etoposide	3	1.3442
DSM	Etoposide	3	1.43094
DSM	Etoposide	3	1.3778
DSM	Etoposide	3	1.42719
DSM	Etoposide	3	1.3272
DSM	Etoposide	10	0.630908
DSM	Etoposide	10	0.620651
DSM	Etoposide	10	0.621362
DSM	Etoposide	10	0.659917
DSM	Etoposide	10	0.652258
DSM	Etoposide	10	0.724426
DSM	Etoposide	30	0.75164
DSM	Etoposide	30	0.885416
DSM	Etoposide	30	0.854482
DSM	Etoposide	30	0.914867
DSM	Etoposide	30	0.974519
DSM	Etoposide	30	0.932047
DSM	Etoposide	100	1.6088
DSM	Etoposide	100	1.7469
DSM	Etoposide	100	1.66408
DSM	Etoposide	100	1.78896
DSM	Etoposide	100	1.76573
DSM	Etoposide	100	1.77329
dSMAD	Etoposide	0	3.97819
dSMAD	Etoposide	0	3.71294
dSMAD	Etoposide	0	3.78847
dSMAD	Etoposide	0	3.58021
dSMAD	Etoposide	0	3.38832
dSMAD	Etoposide	0	3.59187
dSMAD	Etoposide	0.1	0.613013
dSMAD	Etoposide	0.1	0.644275
dSMAD	Etoposide	0.1	0.621733
dSMAD	Etoposide	0.1	0.632965
dSMAD	Etoposide	0.1	0.610111
dSMAD	Etoposide	0.1	0.797944
dSMAD	Etoposide	0.3	0.0464852
dSMAD	Etoposide	0.3	0.0486936
dSMAD	Etoposide	0.3	-0.00588702
dSMAD	Etoposide	0.3	0.0476721
dSMAD	Etoposide	0.3	0.0624065
dSMAD	Etoposide	0.3	0.071307
dSMAD	Etoposide	1	-0.0126272
dSMAD	Etoposide	1	-0.0317542
dSMAD	Etoposide	1	-0.058065
dSMAD	Etoposide	1	-0.0189046
dSMAD	Etoposide	1	-0.00194268
dSMAD	Etoposide	1	-0.00178922
dSMAD	Etoposide	3	-0.106375
dSMAD	Etoposide	3	-0.100347
dSMAD	Etoposide	3	-0.114537
dSMAD	Etoposide	3	-0.103584
dSMAD	Etoposide	3	-0.0874978
dSMAD	Etoposide	3	-0.104064
dSMAD	Etoposide	10	-0.147471
dSMAD	Etoposide	10	-0.147632
dSMAD	Etoposide	10	-0.15342
dSMAD	Etoposide	10	-0.148099
dSMAD	Etoposide	10	-0.143733
dSMAD	Etoposide	10	-0.143013
dSMAD	Etoposide	30	-0.0817671
dSMAD	Etoposide	30	-0.10116
dSMAD	Etoposide	30	-0.126229
dSMAD	Etoposide	30	-0.0933004
dSMAD	Etoposide	30	-0.0823377
dSMAD	Etoposide	30	-0.0988728
dSMAD	Etoposide	100	0.00959782
dSMAD	Etoposide	100	0.0179085
dSMAD	Etoposide	100	-0.0379285
dSMAD	Etoposide	100	0.0169134
dSMAD	Etoposide	100	0.0325925
dSMAD	Etoposide	100	0.0201384
oh-NSC-3-fb	Etoposide	0	7.77825
oh-NSC-3-fb	Etoposide	0	7.88905
oh-NSC-3-fb	Etoposide	0	7.53104
oh-NSC-3-fb	Etoposide	0	7.77803
oh-NSC-3-fb	Etoposide	0	7.83703
oh-NSC-3-fb	Etoposide	0	8.12869
oh-NSC-3-fb	Etoposide	0.1	6.2891
oh-NSC-3-fb	Etoposide	0.1	6.03669
oh-NSC-3-fb	Etoposide	0.1	6.71428
oh-NSC-3-fb	Etoposide	0.1	6.84512
oh-NSC-3-fb	Etoposide	0.1	6.28921
oh-NSC-3-fb	Etoposide	0.1	6.42881
oh-NSC-3-fb	Etoposide	0.3	6.30833
oh-NSC-3-fb	Etoposide	0.3	6.12519
oh-NSC-3-fb	Etoposide	0.3	6.46683
oh-NSC-3-fb	Etoposide	0.3	6.1085
oh-NSC-3-fb	Etoposide	0.3	6.11584
oh-NSC-3-fb	Etoposide	0.3	6.50722
oh-NSC-3-fb	Etoposide	1	5.39146
oh-NSC-3-fb	Etoposide	1	4.96978
oh-NSC-3-fb	Etoposide	1	5.40681
oh-NSC-3-fb	Etoposide	1	5.60436
oh-NSC-3-fb	Etoposide	1	5.60774
oh-NSC-3-fb	Etoposide	1	5.46112
oh-NSC-3-fb	Etoposide	3	4.53221
oh-NSC-3-fb	Etoposide	3	4.16939
oh-NSC-3-fb	Etoposide	3	4.41096
oh-NSC-3-fb	Etoposide	3	4.75862
oh-NSC-3-fb	Etoposide	3	4.32012
oh-NSC-3-fb	Etoposide	3	4.39122
oh-NSC-3-fb	Etoposide	10	3.59615
oh-NSC-3-fb	Etoposide	10	3.10141
oh-NSC-3-fb	Etoposide	10	3.57871
oh-NSC-3-fb	Etoposide	10	3.75048
oh-NSC-3-fb	Etoposide	10	3.05638
oh-NSC-3-fb	Etoposide	10	3.65165
oh-NSC-3-fb	Etoposide	30	3.1307
oh-NSC-3-fb	Etoposide	30	3.20916
oh-NSC-3-fb	Etoposide	30	3.12132
oh-NSC-3-fb	Etoposide	30	3.25905
oh-NSC-3-fb	Etoposide	30	2.87
oh-NSC-3-fb	Etoposide	30	3.03462
oh-NSC-3-fb	Etoposide	100	2.33189
oh-NSC-3-fb	Etoposide	100	2.56432
oh-NSC-3-fb	Etoposide	100	2.59862
oh-NSC-3-fb	Etoposide	100	2.45837
oh-NSC-3-fb	Etoposide	100	2.23397
oh-NSC-3-fb	Etoposide	100	2.47493
oh-NSC-7-fb	Etoposide	0	7.30499
oh-NSC-7-fb	Etoposide	0	7.22125
oh-NSC-7-fb	Etoposide	0	7.05451
oh-NSC-7-fb	Etoposide	0	7.39173
oh-NSC-7-fb	Etoposide	0	7.62494
oh-NSC-7-fb	Etoposide	0	7.59991
oh-NSC-7-fb	Etoposide	0.1	6.89543
oh-NSC-7-fb	Etoposide	0.1	6.55263
oh-NSC-7-fb	Etoposide	0.1	6.50862
oh-NSC-7-fb	Etoposide	0.1	6.97264
oh-NSC-7-fb	Etoposide	0.1	6.97275
oh-NSC-7-fb	Etoposide	0.1	7.30488
oh-NSC-7-fb	Etoposide	0.3	6.66348
oh-NSC-7-fb	Etoposide	0.3	6.45039
oh-NSC-7-fb	Etoposide	0.3	6.73795
oh-NSC-7-fb	Etoposide	0.3	6.66203
oh-NSC-7-fb	Etoposide	0.3	6.58767
oh-NSC-7-fb	Etoposide	0.3	6.81424
oh-NSC-7-fb	Etoposide	1	5.76143
oh-NSC-7-fb	Etoposide	1	5.57288
oh-NSC-7-fb	Etoposide	1	5.61152
oh-NSC-7-fb	Etoposide	1	5.72617
oh-NSC-7-fb	Etoposide	1	5.64638
oh-NSC-7-fb	Etoposide	1	5.74517
oh-NSC-7-fb	Etoposide	3	5.38233
oh-NSC-7-fb	Etoposide	3	5.08248
oh-NSC-7-fb	Etoposide	3	5.37151
oh-NSC-7-fb	Etoposide	3	5.18813
oh-NSC-7-fb	Etoposide	3	5.11781
oh-NSC-7-fb	Etoposide	3	5.39734
oh-NSC-7-fb	Etoposide	10	4.41888
oh-NSC-7-fb	Etoposide	10	4.33021
oh-NSC-7-fb	Etoposide	10	4.34735
oh-NSC-7-fb	Etoposide	10	4.45249
oh-NSC-7-fb	Etoposide	10	4.28465
oh-NSC-7-fb	Etoposide	10	4.51186
oh-NSC-7-fb	Etoposide	30	3.72676
oh-NSC-7-fb	Etoposide	30	3.65699
oh-NSC-7-fb	Etoposide	30	3.89298
oh-NSC-7-fb	Etoposide	30	3.73622
oh-NSC-7-fb	Etoposide	30	3.59934
oh-NSC-7-fb	Etoposide	30	3.70439
oh-NSC-7-fb	Etoposide	100	3.21961
oh-NSC-7-fb	Etoposide	100	2.60549
oh-NSC-7-fb	Etoposide	100	2.78155
oh-NSC-7-fb	Etoposide	100	3.19826
oh-NSC-7-fb	Etoposide	100	3.01434
oh-NSC-7-fb	Etoposide	100	3.02392
DSM	Mercaptopurine	0	4.05688
DSM	Mercaptopurine	0	4.0883
DSM	Mercaptopurine	0	4.43579
DSM	Mercaptopurine	0	4.39313
DSM	Mercaptopurine	0	4.35545
DSM	Mercaptopurine	0	4.2247
DSM	Mercaptopurine	1	3.98076
DSM	Mercaptopurine	1	3.48619
DSM	Mercaptopurine	1	3.894
DSM	Mercaptopurine	1	3.72629
DSM	Mercaptopurine	1	3.83731
DSM	Mercaptopurine	1	3.85476
DSM	Mercaptopurine	3	3.4309
DSM	Mercaptopurine	3	3.72109
DSM	Mercaptopurine	3	3.70822
DSM	Mercaptopurine	3	3.77673
DSM	Mercaptopurine	3	3.81995
DSM	Mercaptopurine	3	4.07707
DSM	Mercaptopurine	10	2.89682
DSM	Mercaptopurine	10	2.9895
DSM	Mercaptopurine	10	2.83481
DSM	Mercaptopurine	10	3.27785
DSM	Mercaptopurine	10	3.19304
DSM	Mercaptopurine	10	3.18656
DSM	Mercaptopurine	30	2.7692
DSM	Mercaptopurine	30	2.6423
DSM	Mercaptopurine	30	2.84459
DSM	Mercaptopurine	30	2.8474
DSM	Mercaptopurine	30	3.11922
DSM	Mercaptopurine	30	3.22284
DSM	Mercaptopurine	100	1.91628
DSM	Mercaptopurine	100	1.60461
DSM	Mercaptopurine	100	2.12038
DSM	Mercaptopurine	100	2.35707
DSM	Mercaptopurine	100	2.00537
DSM	Mercaptopurine	100	2.60458
DSM	Mercaptopurine	300	1.55351
DSM	Mercaptopurine	300	1.57011
DSM	Mercaptopurine	300	1.58584
DSM	Mercaptopurine	300	2.06608
DSM	Mercaptopurine	300	2.09667
DSM	Mercaptopurine	300	1.90239
DSM	Mercaptopurine	1000	1.3011
DSM	Mercaptopurine	1000	1.7738
DSM	Mercaptopurine	1000	1.70696
DSM	Mercaptopurine	1000	1.52664
DSM	Mercaptopurine	1000	1.60224
DSM	Mercaptopurine	1000	1.45429
dSMAD	Mercaptopurine	0	4.28731
dSMAD	Mercaptopurine	0	4.00934
dSMAD	Mercaptopurine	0	4.06594
dSMAD	Mercaptopurine	0	4.5432
dSMAD	Mercaptopurine	0	4.19617
dSMAD	Mercaptopurine	0	4.43116
dSMAD	Mercaptopurine	1	3.59645
dSMAD	Mercaptopurine	1	3.31889
dSMAD	Mercaptopurine	1	3.07929
dSMAD	Mercaptopurine	1	3.69019
dSMAD	Mercaptopurine	1	3.63719
dSMAD	Mercaptopurine	1	3.87225
dSMAD	Mercaptopurine	3	3.18716
dSMAD	Mercaptopurine	3	3.06231
dSMAD	Mercaptopurine	3	2.94194
dSMAD	Mercaptopurine	3	2.92352
dSMAD	Mercaptopurine	3	2.90447
dSMAD	Mercaptopurine	3	3.29637
dSMAD	Mercaptopurine	10	2.77363
dSMAD	Mercaptopurine	10	2.61883
dSMAD	Mercaptopurine	10	2.3911
dSMAD	Mercaptopurine	10	2.43083
dSMAD	Mercaptopurine	10	3.05881
dSMAD	Mercaptopurine	10	3.10809
dSMAD	Mercaptopurine	30	1.78375
dSMAD	Mercaptopurine	30	1.81549
dSMAD	Mercaptopurine	30	1.45841
dSMAD	Mercaptopurine	30	1.9195
dSMAD	Mercaptopurine	30	2.09765
dSMAD	Mercaptopurine	30	1.97747
dSMAD	Mercaptopurine	100	0.651825
dSMAD	Mercaptopurine	100	0.826152
dSMAD	Mercaptopurine	100	0.705244
dSMAD	Mercaptopurine	100	1.04757
dSMAD	Mercaptopurine	100	1.36615
dSMAD	Mercaptopurine	100	1.53099
dSMAD	Mercaptopurine	300	0.608404
dSMAD	Mercaptopurine	300	0.670816
dSMAD	Mercaptopurine	300	0.632354
dSMAD	Mercaptopurine	300	0.597642
dSMAD	Mercaptopurine	300	1.03935
dSMAD	Mercaptopurine	300	0.919995
dSMAD	Mercaptopurine	1000	1.30574
dSMAD	Mercaptopurine	1000	0.745431
dSMAD	Mercaptopurine	1000	1.06888
dSMAD	Mercaptopurine	1000	1.27632
dSMAD	Mercaptopurine	1000	0.670084
dSMAD	Mercaptopurine	1000	0.595562
oh-NSC-3-fb	Mercaptopurine	0	6.56984
oh-NSC-3-fb	Mercaptopurine	0	5.82579
oh-NSC-3-fb	Mercaptopurine	0	6.6328
oh-NSC-3-fb	Mercaptopurine	0	6.48456
oh-NSC-3-fb	Mercaptopurine	0	6.49071
oh-NSC-3-fb	Mercaptopurine	0	6.99689
oh-NSC-3-fb	Mercaptopurine	1	4.68937
oh-NSC-3-fb	Mercaptopurine	1	4.1776
oh-NSC-3-fb	Mercaptopurine	1	4.66901
oh-NSC-3-fb	Mercaptopurine	1	4.31328
oh-NSC-3-fb	Mercaptopurine	1	4.86419
oh-NSC-3-fb	Mercaptopurine	1	4.90411
oh-NSC-3-fb	Mercaptopurine	3	3.75802
oh-NSC-3-fb	Mercaptopurine	3	3.48319
oh-NSC-3-fb	Mercaptopurine	3	3.3461
oh-NSC-3-fb	Mercaptopurine	3	3.67123
oh-NSC-3-fb	Mercaptopurine	3	3.61989
oh-NSC-3-fb	Mercaptopurine	3	3.85957
oh-NSC-3-fb	Mercaptopurine	10	3.36838
oh-NSC-3-fb	Mercaptopurine	10	3.04966
oh-NSC-3-fb	Mercaptopurine	10	3.49391
oh-NSC-3-fb	Mercaptopurine	10	3.61369
oh-NSC-3-fb	Mercaptopurine	10	3.43027
oh-NSC-3-fb	Mercaptopurine	10	3.69964
oh-NSC-3-fb	Mercaptopurine	30	2.81658
oh-NSC-3-fb	Mercaptopurine	30	2.95618
oh-NSC-3-fb	Mercaptopurine	30	2.81262
oh-NSC-3-fb	Mercaptopurine	30	3.43709
oh-NSC-3-fb	Mercaptopurine	30	3.00793
oh-NSC-3-fb	Mercaptopurine	30	3.45237
oh-NSC-3-fb	Mercaptopurine	100	2.43014
oh-NSC-3-fb	Mercaptopurine	100	1.97488
oh-NSC-3-fb	Mercaptopurine	100	2.33667
oh-NSC-3-fb	Mercaptopurine	100	1.65429
oh-NSC-3-fb	Mercaptopurine	100	2.21889
oh-NSC-3-fb	Mercaptopurine	100	2.79592
oh-NSC-3-fb	Mercaptopurine	300	2.30649
oh-NSC-3-fb	Mercaptopurine	300	1.62768
oh-NSC-3-fb	Mercaptopurine	300	1.76041
oh-NSC-3-fb	Mercaptopurine	300	1.82835
oh-NSC-3-fb	Mercaptopurine	300	1.46909
oh-NSC-3-fb	Mercaptopurine	300	1.98566
oh-NSC-3-fb	Mercaptopurine	1000	2.61858
oh-NSC-3-fb	Mercaptopurine	1000	2.05168
oh-NSC-3-fb	Mercaptopurine	1000	2.36994
oh-NSC-3-fb	Mercaptopurine	1000	2.6771
oh-NSC-3-fb	Mercaptopurine	1000	2.46937
oh-NSC-3-fb	Mercaptopurine	1000	2.98119
oh-NSC-7-fb	Mercaptopurine	0	6.97155
oh-NSC-7-fb	Mercaptopurine	0	6.92516
oh-NSC-7-fb	Mercaptopurine	0	6.74902
oh-NSC-7-fb	Mercaptopurine	0	6.76213
oh-NSC-7-fb	Mercaptopurine	0	6.86809
oh-NSC-7-fb	Mercaptopurine	0	7.09359
oh-NSC-7-fb	Mercaptopurine	1	5.17816
oh-NSC-7-fb	Mercaptopurine	1	5.48542
oh-NSC-7-fb	Mercaptopurine	1	5.09795
oh-NSC-7-fb	Mercaptopurine	1	5.09243
oh-NSC-7-fb	Mercaptopurine	1	5.19946
oh-NSC-7-fb	Mercaptopurine	1	5.04375
oh-NSC-7-fb	Mercaptopurine	3	4.6979
oh-NSC-7-fb	Mercaptopurine	3	4.67433
oh-NSC-7-fb	Mercaptopurine	3	4.52115
oh-NSC-7-fb	Mercaptopurine	3	4.53879
oh-NSC-7-fb	Mercaptopurine	3	4.57382
oh-NSC-7-fb	Mercaptopurine	3	4.60311
oh-NSC-7-fb	Mercaptopurine	10	4.35702
oh-NSC-7-fb	Mercaptopurine	10	4.28286
oh-NSC-7-fb	Mercaptopurine	10	4.11139
oh-NSC-7-fb	Mercaptopurine	10	4.29697
oh-NSC-7-fb	Mercaptopurine	10	4.24267
oh-NSC-7-fb	Mercaptopurine	10	4.19666
oh-NSC-7-fb	Mercaptopurine	30	3.92142
oh-NSC-7-fb	Mercaptopurine	30	3.87701
oh-NSC-7-fb	Mercaptopurine	30	3.93036
oh-NSC-7-fb	Mercaptopurine	30	3.93818
oh-NSC-7-fb	Mercaptopurine	30	3.88548
oh-NSC-7-fb	Mercaptopurine	30	3.77117
oh-NSC-7-fb	Mercaptopurine	100	3.02387
oh-NSC-7-fb	Mercaptopurine	100	3.00274
oh-NSC-7-fb	Mercaptopurine	100	3.0842
oh-NSC-7-fb	Mercaptopurine	100	2.92441
oh-NSC-7-fb	Mercaptopurine	100	2.91105
oh-NSC-7-fb	Mercaptopurine	100	2.55495
oh-NSC-7-fb	Mercaptopurine	300	2.78192
oh-NSC-7-fb	Mercaptopurine	300	2.69187
oh-NSC-7-fb	Mercaptopurine	300	2.59697
oh-NSC-7-fb	Mercaptopurine	300	2.53847
oh-NSC-7-fb	Mercaptopurine	300	2.62778
oh-NSC-7-fb	Mercaptopurine	300	2.51784
oh-NSC-7-fb	Mercaptopurine	1000	2.70947
oh-NSC-7-fb	Mercaptopurine	1000	2.74805
oh-NSC-7-fb	Mercaptopurine	1000	2.29067
oh-NSC-7-fb	Mercaptopurine	1000	2.84099
oh-NSC-7-fb	Mercaptopurine	1000	2.87953
oh-NSC-7-fb	Mercaptopurine	1000	2.78862
DSM	Methotrexate	0	4.05871
DSM	Methotrexate	0	4.05788
DSM	Methotrexate	0	4.43003
DSM	Methotrexate	0	4.03435
DSM	Methotrexate	0	4.53498
DSM	Methotrexate	0	4.5607
DSM	Methotrexate	0.1	3.60187
DSM	Methotrexate	0.1	3.91288
DSM	Methotrexate	0.1	4.07572
DSM	Methotrexate	0.1	4.16687
DSM	Methotrexate	0.1	4.24239
DSM	Methotrexate	0.1	4.35199
DSM	Methotrexate	0.3	4.27463
DSM	Methotrexate	0.3	4.07808
DSM	Methotrexate	0.3	4.7558
DSM	Methotrexate	0.3	4.21262
DSM	Methotrexate	0.3	4.46871
DSM	Methotrexate	0.3	4.72657
DSM	Methotrexate	1	4.09215
DSM	Methotrexate	1	4.13488
DSM	Methotrexate	1	4.2384
DSM	Methotrexate	1	4.64178
DSM	Methotrexate	1	3.99555
DSM	Methotrexate	1	4.85389
DSM	Methotrexate	3	3.85497
DSM	Methotrexate	3	4.31881
DSM	Methotrexate	3	4.49308
DSM	Methotrexate	3	4.7988
DSM	Methotrexate	3	4.36208
DSM	Methotrexate	3	4.92228
DSM	Methotrexate	10	4.2321
DSM	Methotrexate	10	4.09893
DSM	Methotrexate	10	4.59473
DSM	Methotrexate	10	4.36613
DSM	Methotrexate	10	4.5121
DSM	Methotrexate	10	4.71061
DSM	Methotrexate	30	4.55627
DSM	Methotrexate	30	4.08593
DSM	Methotrexate	30	4.55857
DSM	Methotrexate	30	4.28975
DSM	Methotrexate	30	4.05761
DSM	Methotrexate	30	4.97923
DSM	Methotrexate	100	3.33646
DSM	Methotrexate	100	4.19589
DSM	Methotrexate	100	4.52307
DSM	Methotrexate	100	4.34018
DSM	Methotrexate	100	3.8902
DSM	Methotrexate	100	4.36711
dSMAD	Methotrexate	0	3.51697
dSMAD	Methotrexate	0	4.33549
dSMAD	Methotrexate	0	4.15447
dSMAD	Methotrexate	0	4.02048
dSMAD	Methotrexate	0	3.65681
dSMAD	Methotrexate	0	3.48389
dSMAD	Methotrexate	0.1	3.84946
dSMAD	Methotrexate	0.1	3.92202
dSMAD	Methotrexate	0.1	4.19361
dSMAD	Methotrexate	0.1	3.39215
dSMAD	Methotrexate	0.1	3.904
dSMAD	Methotrexate	0.1	3.57823
dSMAD	Methotrexate	0.3	3.66282
dSMAD	Methotrexate	0.3	3.71551
dSMAD	Methotrexate	0.3	3.67737
dSMAD	Methotrexate	0.3	3.45266
dSMAD	Methotrexate	0.3	3.39378
dSMAD	Methotrexate	0.3	3.22991
dSMAD	Methotrexate	1	3.00175
dSMAD	Methotrexate	1	3.18552
dSMAD	Methotrexate	1	3.01741
dSMAD	Methotrexate	1	3.16044
dSMAD	Methotrexate	1	3.6624
dSMAD	Methotrexate	1	3.20278
dSMAD	Methotrexate	3	2.95303
dSMAD	Methotrexate	3	2.99396
dSMAD	Methotrexate	3	2.9624
dSMAD	Methotrexate	3	2.91607
dSMAD	Methotrexate	3	3.15469
dSMAD	Methotrexate	3	3.04962
dSMAD	Methotrexate	10	3.02339
dSMAD	Methotrexate	10	2.94497
dSMAD	Methotrexate	10	2.99788
dSMAD	Methotrexate	10	2.88554
dSMAD	Methotrexate	10	3.10095
dSMAD	Methotrexate	10	2.86471
dSMAD	Methotrexate	30	3.12042
dSMAD	Methotrexate	30	2.97435
dSMAD	Methotrexate	30	3.0191
dSMAD	Methotrexate	30	3.06095
dSMAD	Methotrexate	30	3.09588
dSMAD	Methotrexate	30	2.97327
dSMAD	Methotrexate	100	3.04027
dSMAD	Methotrexate	100	3.07567
dSMAD	Methotrexate	100	3.13516
dSMAD	Methotrexate	100	3.05366
dSMAD	Methotrexate	100	3.15925
dSMAD	Methotrexate	100	3.02492
oh-NSC-3-fb	Methotrexate	0	6.13286
oh-NSC-3-fb	Methotrexate	0	6.30538
oh-NSC-3-fb	Methotrexate	0	6.39941
oh-NSC-3-fb	Methotrexate	0	6.05152
oh-NSC-3-fb	Methotrexate	0	6.09785
oh-NSC-3-fb	Methotrexate	0	6.67661
oh-NSC-3-fb	Methotrexate	0.1	5.56139
oh-NSC-3-fb	Methotrexate	0.1	5.47554
oh-NSC-3-fb	Methotrexate	0.1	5.35549
oh-NSC-3-fb	Methotrexate	0.1	5.78489
oh-NSC-3-fb	Methotrexate	0.1	5.73654
oh-NSC-3-fb	Methotrexate	0.1	5.94939
oh-NSC-3-fb	Methotrexate	0.3	4.79539
oh-NSC-3-fb	Methotrexate	0.3	4.87545
oh-NSC-3-fb	Methotrexate	0.3	5.11129
oh-NSC-3-fb	Methotrexate	0.3	5.01064
oh-NSC-3-fb	Methotrexate	0.3	4.78387
oh-NSC-3-fb	Methotrexate	0.3	5.28413
oh-NSC-3-fb	Methotrexate	1	4.34974
oh-NSC-3-fb	Methotrexate	1	4.39365
oh-NSC-3-fb	Methotrexate	1	4.30707
oh-NSC-3-fb	Methotrexate	1	4.53932
oh-NSC-3-fb	Methotrexate	1	4.42143
oh-NSC-3-fb	Methotrexate	1	4.82537
oh-NSC-3-fb	Methotrexate	3	4.14543
oh-NSC-3-fb	Methotrexate	3	4.33801
oh-NSC-3-fb	Methotrexate	3	4.52052
oh-NSC-3-fb	Methotrexate	3	4.42746
oh-NSC-3-fb	Methotrexate	3	4.37833
oh-NSC-3-fb	Methotrexate	3	4.76513
oh-NSC-3-fb	Methotrexate	10	4.41016
oh-NSC-3-fb	Methotrexate	10	4.59356
oh-NSC-3-fb	Methotrexate	10	4.60909
oh-NSC-3-fb	Methotrexate	10	4.71396
oh-NSC-3-fb	Methotrexate	10	4.584
oh-NSC-3-fb	Methotrexate	10	4.86655
oh-NSC-3-fb	Methotrexate	30	4.41293
oh-NSC-3-fb	Methotrexate	30	4.87648
oh-NSC-3-fb	Methotrexate	30	4.73885
oh-NSC-3-fb	Methotrexate	30	4.76328
oh-NSC-3-fb	Methotrexate	30	4.5443
oh-NSC-3-fb	Methotrexate	30	4.88809
oh-NSC-3-fb	Methotrexate	100	4.44922
oh-NSC-3-fb	Methotrexate	100	4.5853
oh-NSC-3-fb	Methotrexate	100	4.79259
oh-NSC-3-fb	Methotrexate	100	4.91463
oh-NSC-3-fb	Methotrexate	100	4.55333
oh-NSC-3-fb	Methotrexate	100	4.92806
oh-NSC-7-fb	Methotrexate	0	6.9446
oh-NSC-7-fb	Methotrexate	0	6.65579
oh-NSC-7-fb	Methotrexate	0	6.85909
oh-NSC-7-fb	Methotrexate	0	6.66914
oh-NSC-7-fb	Methotrexate	0	7.20081
oh-NSC-7-fb	Methotrexate	0	7.64001
oh-NSC-7-fb	Methotrexate	0.1	6.02176
oh-NSC-7-fb	Methotrexate	0.1	5.95692
oh-NSC-7-fb	Methotrexate	0.1	6.01176
oh-NSC-7-fb	Methotrexate	0.1	6.06828
oh-NSC-7-fb	Methotrexate	0.1	6.13609
oh-NSC-7-fb	Methotrexate	0.1	6.23477
oh-NSC-7-fb	Methotrexate	0.3	5.54706
oh-NSC-7-fb	Methotrexate	0.3	5.17535
oh-NSC-7-fb	Methotrexate	0.3	5.40437
oh-NSC-7-fb	Methotrexate	0.3	5.41277
oh-NSC-7-fb	Methotrexate	0.3	5.44387
oh-NSC-7-fb	Methotrexate	0.3	6.01114
oh-NSC-7-fb	Methotrexate	1	5.6282
oh-NSC-7-fb	Methotrexate	1	5.32049
oh-NSC-7-fb	Methotrexate	1	5.43552
oh-NSC-7-fb	Methotrexate	1	5.2622
oh-NSC-7-fb	Methotrexate	1	5.58416
oh-NSC-7-fb	Methotrexate	1	5.74146
oh-NSC-7-fb	Methotrexate	3	5.33184
oh-NSC-7-fb	Methotrexate	3	5.28138
oh-NSC-7-fb	Methotrexate	3	4.90134
oh-NSC-7-fb	Methotrexate	3	5.30365
oh-NSC-7-fb	Methotrexate	3	5.4186
oh-NSC-7-fb	Methotrexate	3	5.68094
oh-NSC-7-fb	Methotrexate	10	5.58861
oh-NSC-7-fb	Methotrexate	10	5.38335
oh-NSC-7-fb	Methotrexate	10	5.36574
oh-NSC-7-fb	Methotrexate	10	5.38996
oh-NSC-7-fb	Methotrexate	10	5.51931
oh-NSC-7-fb	Methotrexate	10	5.86827
oh-NSC-7-fb	Methotrexate	30	5.3498
oh-NSC-7-fb	Methotrexate	30	5.415
oh-NSC-7-fb	Methotrexate	30	5.47341
oh-NSC-7-fb	Methotrexate	30	5.38563
oh-NSC-7-fb	Methotrexate	30	5.36796
oh-NSC-7-fb	Methotrexate	30	5.84166
oh-NSC-7-fb	Methotrexate	100	5.68305
oh-NSC-7-fb	Methotrexate	100	5.56573
oh-NSC-7-fb	Methotrexate	100	5.69027
oh-NSC-7-fb	Methotrexate	100	5.5175
oh-NSC-7-fb	Methotrexate	100	5.67949
oh-NSC-7-fb	Methotrexate	100	5.76478
